# Supplementary material
Source: HighWire-hosted journal article supplement (https://www.genetics.org/content/suppl/2012/11/05/192.3.775)
Supplement: TableS1.pdf [file TableS1.pdf]

**Table S1 Proteins involved in cell wall biogenesis in *Saccharomyces cerevisiae***

| Process or protein type | Protein name   | Activity or Function                           | CAZy Family <sup>1</sup> |
|-------------------------|----------------|------------------------------------------------|--------------------------|
| <b>Precursor supply</b> |                |                                                |                          |
|                         | Ugp1           | UDPGlc pyrophosphorylase                       |                          |
|                         | Pmi40          | phosphomannose isomerase                       |                          |
|                         | Sec53          | phosphomannomutase                             |                          |
|                         | Psa1/Srb1/Vig9 | GDP-Man pyrophosphorylase                      |                          |
|                         | Gfa1           | glutamine: Fru-6-P amidotransferase            |                          |
|                         | Gna1           | GlcN-6-P N-acetylase                           |                          |
|                         | Agm1/Pcm1      | GlcNAc phosphate mutase                        |                          |
|                         | Uap1/Qri1      | UDPGlcNAc pyrophosphorylase                    |                          |
|                         | Rer2           | cis-prenyltransferase (Dol <sub>10-14</sub> )  |                          |
|                         | Srt1           | cis-prenyltransferase (Dol <sub>19-22</sub> )  |                          |
|                         | Dfg10          | dehydrodolichol reductase                      |                          |
|                         | Sec59          | Dol-kinase                                     |                          |
|                         | Cwh8/Cax4      | Dolichyl pyrophosphate phosphatase             |                          |
|                         | Dpm1           | GDP-mannose:dolichyl-phosphate Man-T           | GT2                      |
|                         | Alg5           | UDP-glucose:dolichyl-phosphate Glc-T           | GT2                      |
|                         | Yea4           | UDP-GlcNAc transporter                         |                          |
|                         | Vrg4/Vig4      | GDP-Man transporter                            |                          |
|                         | Gda1           | GDPase                                         |                          |
|                         | Ynd1           | Apyrase                                        |                          |
| <b>N-glycosylation</b>  |                |                                                |                          |
|                         | Alg7           | UDP-GlcNAc: Dol-P GlcNAc-1-P-T                 |                          |
|                         | Alg13 + Alg14  | UDP-GlcNAc: Dol-PP-GlcNAc $\beta$ 1,4-GlcNAc-T | GT1                      |

|            |                                                                                                                                                |      |
|------------|------------------------------------------------------------------------------------------------------------------------------------------------|------|
| Alg1       | GDP-Man: Dol-PP-GlcNAc <sub>2</sub> β1,4-Man-T                                                                                                 | GT33 |
| Alg2       | GDP-Man: Dol-PP-GlcNAc <sub>2</sub> Man α1,3-Man-T <i>and</i> GDP-Man: Dol-PP-GlcNAc <sub>2</sub> Man <sub>2</sub> α1,6-Man-T                  | GT4  |
| Alg11      | GDP-Man: Dol-PP-GlcNAc <sub>2</sub> Man <sub>3</sub> α1,2-Man-T <i>and</i> GDP-Man: Dol-PP-GlcNAc <sub>2</sub> Man <sub>4</sub> α1,2-Man-T     | GT4  |
| Rft1       | Candidate Dol-PP-oligosaccharide flippase                                                                                                      |      |
| Alg3       | Dol-P-Man: Dol-PP-GlcNAc <sub>2</sub> Man <sub>5</sub> α1,3-Man-T                                                                              | GT58 |
| Alg9       | Dol-P-Man: Dol-PP-GlcNAc <sub>2</sub> Man <sub>6</sub> α1,2-Man-T <i>and</i> Dol-P-Man: Dol-PP-GlcNAc <sub>2</sub> Man <sub>8</sub> α1,2-Man-T | GT22 |
| Alg12      | Dol-P-Man: Dol-PP-GlcNAc <sub>2</sub> Man <sub>7</sub> α1,6-Man-T                                                                              | GT22 |
| Alg6       | Dol-P-Man: Dol-PP-GlcNAc <sub>2</sub> Man <sub>9</sub> α1,3-Glc-T                                                                              | GT57 |
| Alg8       | Dol-P-Man: Dol-PP-GlcNAc <sub>2</sub> Man <sub>9</sub> Glc α1,3-Glc-T                                                                          | GT57 |
| Alg10      | Dol-P-Man: Dol-PP-GlcNAc <sub>2</sub> Man <sub>9</sub> Glc <sub>2</sub> α1,2-Glc-T                                                             | GT59 |
| Stt3       | OST catalytic subunit                                                                                                                          | GT66 |
| Wbp1       | OST subunit                                                                                                                                    |      |
| Swp1       | OST subunit                                                                                                                                    |      |
| Ost1       | OST subunit                                                                                                                                    |      |
| Ost2       | OST subunit                                                                                                                                    |      |
| Ost3       | OST subunit; cysteine oxidoreductase                                                                                                           |      |
| Ost6       | OST subunit; cysteine oxidoreductase                                                                                                           |      |
| Gls1/Cwh41 | ER glucosidase I (α1,2 exoglucosidase); indirectly affects β1,6-glucan                                                                         | GH63 |
| Gls2/Rot2  | ER glucosidase II (α1,3 exoglucosidase α-subunit); indirectly affects β1,6-glucan                                                              | GH31 |
| Gtb1       | ER glucosidase II (regulatory subunit)                                                                                                         |      |
| Mns1       | ER α-mannosidase I                                                                                                                             | GH47 |
| Htm1/Mnl1  | ER-degradation enhancing α-mannosidase-like protein                                                                                            | GH47 |
| Yos9       | Lectin, recognizes α1,6-Man on glucosidase II product, targets misfolded protein for ERAD                                                      |      |
| Png1       | Cytosolic peptide N-glycanase                                                                                                                  |      |
| Och1       | Initiating α1,6-Man-T                                                                                                                          | GT32 |
| Mnn9       | M-Pol I α1,6-Man-T                                                                                                                             | GT62 |

|                        |                                                                               |      |
|------------------------|-------------------------------------------------------------------------------|------|
| Van1                   | M-Pol I $\alpha$ 1,6-Man-T                                                    | GT62 |
| Mnn9                   | M-Pol II $\alpha$ 1,6-Man-T                                                   | GT62 |
| Anp1                   | M-Pol II $\alpha$ 1,6-Man-T                                                   | GT62 |
| Mnn10                  | M-Pol II $\alpha$ 1,6-Man-T                                                   | GT34 |
| Mnn11                  | M-Pol II $\alpha$ 1,6-Man-T                                                   | GT34 |
| Hoc1                   | M-Pol II $\alpha$ 1,6-Man-T                                                   | GT32 |
| Mnn2                   | $\alpha$ 1,2-Man-T; Mnn1 subfamily; major role in mannan side chain branching | GT71 |
| Mnn5                   | $\alpha$ 1,2-Man-T; Mnn1 subfamily; major role in mannan side chain branching | GT71 |
| Mnn4                   | Positive regulator of Man phosphorylation                                     |      |
| Mnn6/Ktr6              | $\alpha$ -Man-P-T; acts on N- and O-glycans in Golgi                          | GT15 |
| Mnn1                   | $\alpha$ 1,3-Man-T; acts on N- and O-glycans in Golgi                         | GT71 |
| Kre2/Mnt1              | $\alpha$ 1,2-Man-T; acts on N- and O-glycans in Golgi                         | GT15 |
| Ktr1                   | $\alpha$ 1,2-Man-T; acts on N- and O-glycans in Golgi                         | GT15 |
| Ktr2                   | $\alpha$ 1,2-Man-T; acts on N-glycans in Golgi                                | GT15 |
| Ktr3                   | $\alpha$ 1,2-Man-T; acts on N- and O-glycans in Golgi                         | GT15 |
| Yur1                   | $\alpha$ 1,2-Man-T; acts on N-glycans in Golgi                                | GT15 |
| Ktr4                   | Putative $\alpha$ -ManT                                                       | GT15 |
| Ktr5                   | Putative $\alpha$ -ManT                                                       | GT15 |
| Ktr7                   | Putative $\alpha$ -ManT                                                       | GT15 |
| Gnt1                   | GlcNAc-T                                                                      | GT8  |
| Vrg4                   | GDP-Man transporter                                                           |      |
| Gda1                   | GDPase                                                                        |      |
| Ynd1                   | Apyrase                                                                       |      |
| <b>O-mannosylation</b> |                                                                               |      |
| Pmt1                   | Dol-P-Man: protein: O-Man-T; Pmt1 family                                      | GT39 |
| Pmt2                   | Dol-P-Man: protein: O-Man-T; Pmt2 family                                      | GT39 |

|      |                                                                |      |
|------|----------------------------------------------------------------|------|
| Pmt3 | Dol-P-Man: protein: O-Man-T; Pmt2 family                       | GT39 |
| Pmt4 | Dol-P-Man: protein: O-Man-T; specific for membrane proteins    | GT39 |
| Pmt5 | Dol-P-Man: protein: O-Man-T; Pmt1 family                       | GT39 |
| Pmt6 | Dol-P-Man: protein: O-Man-T; Pmt2 family                       | GT39 |
| Mnt2 | $\alpha$ 1,3-Man-T; Mnn1 subfamily; acts on O-glycans in Golgi | GT71 |
| Mnt3 | $\alpha$ 1,3-Man-T; Mnn1 subfamily; acts on O-glycans in Golgi | GT71 |

#### GPI anchoring

|       |                                                                                   |      |
|-------|-----------------------------------------------------------------------------------|------|
| Gpi1  | GPI-Gnt subunit                                                                   |      |
| Gpi2  | GPI-Gnt subunit                                                                   |      |
| Gpi3  | GPI-Gnt subunit, UDP-GlcNAc: Ptd-Ins $\alpha$ 1,6-GlcNAc transferase              | GT4  |
| Gpi15 | GPI-Gnt subunit                                                                   |      |
| Gpi19 | GPI-Gnt subunit                                                                   |      |
| Eri1  | GPI-Gnt subunit                                                                   |      |
| Ras2  | Negative regulator of GPI-Gnt                                                     |      |
| Gpi12 | GPI-Ins-deacetylase                                                               |      |
| Gwt1  | GPI-Ins-acyltransferase                                                           |      |
| Gpi14 | GPI-ManT-I: Dol-P-Man: GlcN-Ptd-(acyl)Ins $\alpha$ 1,4-Man-T                      | GT50 |
| Pbn1  | Putative subunit of GPI-Man-T-I                                                   |      |
| Arv1  | Proposed to present GlcN-(acyl)PI to Gpi14                                        |      |
| Mcd4  | GPI-Etn-P-T-I                                                                     |      |
| Gpi18 | GPI-ManT-II: Dol-P-Man: Man-GlcN-Ptd-(acyl)Ins $\alpha$ 1,6-Man-T                 | GT76 |
| Pga1  | GPI-ManT-II subunit                                                               |      |
| Gpi10 | GPI-Man-T-III: Dol-P-Man: Man <sub>2</sub> -GlcN-Ptd-(acyl)Ins $\alpha$ 1,2-Man-T | GT22 |
| Smp3  | GPI-Man-T-IV: Dol-P-Man: Man <sub>3</sub> -GlcN-Ptd-(acyl)Ins $\alpha$ 1,2-Man-T  | GT22 |
| Gpi13 | GPI-Etn-P-T-III                                                                   |      |
| Gpi11 | Subunit of GPI-Etn-P-T-II and GPI-Etn-P-T-III                                     |      |

|       |                                                                                                              |
|-------|--------------------------------------------------------------------------------------------------------------|
| Gpi7  | GPI-Etn-P-T-II                                                                                               |
| Gpi8  | GPI transamidase catalytic subunit                                                                           |
| Gaa1  | GPI transamidase subunit                                                                                     |
| Gab1  | GPI transamidase subunit                                                                                     |
| Gpi16 | GPI transamidase subunit                                                                                     |
| Gpi17 | GPI transamidase subunit                                                                                     |
| Bst1  | GlcN-(acyl)PI inositol deacylase                                                                             |
| Per1  | Removes acyl chain at <i>sn</i> -2 position of protein-bound GPIs                                            |
| Gup1  | MBOAT O-acyltransferase, transfers C <sub>26</sub> acyl chain to <i>sn</i> -2 position of protein-bound GPIs |
| Cwh43 | Replaces GPI diacylglycerol with ceramide                                                                    |
| Cdc1  | Homologue of mammalian PGAP5; possible GPI-Etn-P phosphodiesterase                                           |
| Ted1  | Homologue of mammalian PGAP5; possible GPI-Etn-P phosphodiesterase                                           |

#### **Chitin and chitosan synthesis**

|       |                                                                                            |     |
|-------|--------------------------------------------------------------------------------------------|-----|
| Chs1  | Chitin synthase I catalytic protein                                                        | GT2 |
| Chs2  | Chitin synthase II catalytic protein                                                       | GT2 |
| Chs3  | Chitin synthase catalytic subunit                                                          | GT2 |
| Cdk1  | Mitotic protein kinase, phosphorylates Chs2                                                |     |
| Cdc14 | Phosphoprotein phosphatase, dephosphorylates Chs2                                          |     |
| Dbf2  | Mitotic exit kinase, phosphorylates Chs2                                                   |     |
| Inn1  | Localized to mother cell-bud junction with Chs2 and Cyk3, implicated in Chs2 activation    |     |
| Cyk3  | Localized to mother cell-bud junction with Chs2 and Inn1, implicated in Chs2 activation    |     |
| Pfa4  | Protein acyltransferase, palmitoylates Chs3                                                |     |
| Chs7  | Chaperone required for ER exit of Chs3                                                     |     |
| Rcr1  | ER protein, small negative effect on Chs3-dependent chitin synthesis                       |     |
| Yea4  | ER protein and UDP-GlcNAc transporter, <i>yea4Δ</i> has 65% of wild type levels of chitin. |     |
| Chs5  | Exomer component, involved in Chs3 trafficking                                             |     |

|           |                                                                                    |  |
|-----------|------------------------------------------------------------------------------------|--|
| Chs6      | Exomer component, involved in Chs3 trafficking                                     |  |
| Chs4/Skt5 | Prenylated protein that interacts with, activates, and anchors Chs3 to septin ring |  |
| Bni4      | Scaffold protein, tethers Chs3 and Chs4 to septins                                 |  |
| Shc1      | Sporulation-specific Chs4 homologue                                                |  |
| Cda1      | Chitin de-N-acetylase                                                              |  |
| Cda2      | Chitin de-N-acetylase                                                              |  |

### **$\beta$ -1,3 glucan synthesis**

|                               |                                                                           |      |
|-------------------------------|---------------------------------------------------------------------------|------|
| Fks1/Gsc1/Cwh53/<br>Etg1/Pbr1 | Probable $\beta$ 1,3-glucan synthase, major role in vegetative cells      | GT48 |
| Fks2/Gsc2                     | Probable $\beta$ 1,3-glucan synthase, stress-induced, role in sporulation | GT48 |
| Fks3                          | Probable $\beta$ 1,3-glucan synthase, role in sporulation                 | GT48 |
| Rho1                          | GTPase; activator of Fks1 and Fks2                                        |      |

### **$\beta$ -1,6 glucan formation**

|      |                                                                           |      |
|------|---------------------------------------------------------------------------|------|
| Kre5 | Diverged UDP-Glc: glycoprotein Glc-T homologue                            | GT24 |
| Rot1 | Fungus-specific ER chaperone                                              |      |
| Big1 | Fungus-specific ER chaperone                                              |      |
| Keg1 | Fungus-specific ER chaperone                                              |      |
| Kre6 | Resembles $\beta$ -1,6/ $\beta$ -1,3 glucanases                           | GH16 |
| Skn1 | Sequence and functional Kre6 homologue; additional role in MIPC synthesis | GH16 |
| Kre9 | Fungus-specific O-mannosylated protein                                    |      |
| Knh1 | Kre9 homologue                                                            |      |
| Kre1 | GPI-protein, secondary receptor for K1 killer toxin                       |      |

### **Glycosidases, cross-linking enzymes, and proteases**

|           |                                                             |      |
|-----------|-------------------------------------------------------------|------|
| Cts1      | Endo-chitinase                                              | GH18 |
| Cts2      | Chitinase                                                   | GH18 |
| Exg1/Bgl1 | Major exo- $\beta$ -1,3-glucanase of the cell wall; soluble | GH5  |

|                |                                                                                  |      |
|----------------|----------------------------------------------------------------------------------|------|
| Exg2           | GPI-anchored plasma membrane exo- $\beta$ 1,3-glucanase                          | GH5  |
| Ssg1/Spr1      | Sporulation-specific exo- $\beta$ -1,3-glucanase                                 | GH5  |
| Bgl2           | Endo- $\beta$ 1,3-glucanase; can make $\beta$ 1,6-linked Glc side branch         | GH17 |
| Scw4           | Endo- $\beta$ 1,3-endoglucanase-like                                             | GH17 |
| Scw10          | Endo- $\beta$ 1,3-endoglucanase-like                                             | GH17 |
| Scw11          | Endo- $\beta$ 1,3-endoglucanase-like                                             | GH17 |
| Eng1/Dse4      | Endo- $\beta$ 1,3-endoglucanase                                                  | GH81 |
| Eng2/Acf2      | Endo- $\beta$ 1,3-endoglucanase                                                  | GH81 |
| Dcw1           | GPI-protein, resembles $\alpha$ 1,6-endomannanase                                | GH76 |
| Dfg5           | GPI-protein, resembles $\alpha$ 1,6-endomannanase; Dcw1 homologue                | GH76 |
| Crh1           | GPI-protein, chitin $\beta$ -1,6/1,3-glucanosyltransferase                       | GH16 |
| Crh2/Utr2      | GPI-protein, chitin $\beta$ -1,6/1,3-glucanosyltransferase                       | GH16 |
| Crr1           | GPI-protein, chitin $\beta$ -1,6/1,3-glucanosyltransferase; sporulation-specific | GH16 |
| Gas1           | GPI-protein, $\beta$ -1,3-glucanosyltransferase                                  | GH72 |
| Gas2           | GPI-protein, $\beta$ -1,3-glucanosyltransferase; sporulation specific            | GH72 |
| Gas3           | GPI-protein, $\beta$ -1,3-glucanosyltransferase                                  | GH72 |
| Gas4           | GPI-protein, $\beta$ -1,3-glucanosyltransferase; sporulation specific            | GH72 |
| Gas5           | GPI-protein, $\beta$ -1,3-glucanosyltransferase                                  | GH72 |
| Yps1           | GPI-protein, yapsin aspartyl protease                                            |      |
| Yps2/Mkc7      | GPI-protein, yapsin aspartyl protease                                            |      |
| Yps3           | GPI-protein, yapsin aspartyl protease                                            |      |
| Yps6           | GPI-protein, yapsin aspartyl protease                                            |      |
| <b>GPI-CWP</b> |                                                                                  |      |
| Ecm33          | Sps2 family; structural/non-enzymatic                                            |      |
| Pst1           | Sps2 family; structural/non-enzymatic                                            |      |
| Sps2           | Sps2 family; structural/non-enzymatic; required for ascospore wall formation     |      |

|            |                                                                                                   |
|------------|---------------------------------------------------------------------------------------------------|
| Sps22      | Sps2 family; structural/non-enzymatic; required for ascospore wall formation                      |
| Cwp1       | Tip1 family                                                                                       |
| Cwp2       | Tip1 family                                                                                       |
| Tip1       | Tip1 family; anaerobically induced                                                                |
| Tir1       | Tip1 family; anaerobically induced                                                                |
| Tir2       | Tip1 family; anaerobically induced                                                                |
| Tir3       | Tip1 family; anaerobically induced                                                                |
| Tir4       | Tip1 family; anaerobically induced                                                                |
| Dan1/Ccw13 | Tip1 family; anaerobically induced                                                                |
| Dan4       | Tip1 family; anaerobically induced                                                                |
| Sed1       | Induced in stationary phase                                                                       |
| Spi1       | Induced by stress with weak organic acids; related to Sed1                                        |
| Ccw12      | Major role in stabilizing walls of daughter cells walls and mating projections                    |
| Ccw14/Ssr1 | Inner cell wall protein                                                                           |
| Dse2       | Daughter cell specific, role in cell separation                                                   |
| Egt2       | Daughter cell specific, role in cell separation                                                   |
| Fit1       | Iron binding                                                                                      |
| Fit2       | Iron binding                                                                                      |
| Fit3       | Iron binding                                                                                      |
| Flo1       | Flocculin                                                                                         |
| Flo5       | Flocculin                                                                                         |
| Flo9       | Flocculin                                                                                         |
| Flo10      | Flocculin                                                                                         |
| Flo11/Muc1 | Required for pseudohypha formation by diploids and agar invasion by haploids                      |
| Aga1       | <i>MATa</i> agglutinin subunit, disulfide-linked to Aga2, which binds <i>MATα</i> agglutinin Sag1 |
| Fig2       | Aga1-related adhesin                                                                              |



|                          |                                                                                                                    |
|--------------------------|--------------------------------------------------------------------------------------------------------------------|
| Sag1                     | <i>MAT</i> $\alpha$ agglutinin                                                                                     |
| <b>Non-GPI-CWP</b>       |                                                                                                                    |
| Pir1/Ccw6                | “Protein with internal repeat”, ester-linked via Glu (originally Gln in repeats) to $\beta$ 1,3-glucan             |
| Pir2/Hsp150/Ccw7         | “Protein with internal repeat”, ester-linked via Glu (originally Gln in repeats) to $\beta$ 1,3-glucan             |
| Pir3/Ccw8                | “Protein with internal repeat”, ester-linked via Glu (originally Gln in repeats) to $\beta$ 1,3-glucan             |
| Pir4/Cis3/<br>Ccw5/Ccw11 | One “internal repeat” sequence”, ester-linked via Glu (originally Gln in repeats) to $\beta$ 1,3-glucan            |
| Scw3/Sun4                | Member of SUN family                                                                                               |
| Srl1                     | Acts in parallel with Ccw12 in pathway operative when regulation of Ace2 and polarized morphogenesis are defective |

---

<sup>1</sup>CAZy glycosyltransferase (GT) and glycosylhydrolase (GH) families are defined in the Carbohydrate Active Enzymes database (<http://www.cazy.org/>) (Cantarel, B. L., Coutinho, P. M., Rancurel, C., Bernard, T., Lombard, V., et al., 2009 The Carbohydrate-Active EnZymes database (CAZy): an expert resource for Glycogenomics. *Nucleic Acids Res.* **37**: D233-238).
